# Supplementary material
Source: publisher figshare collection journal article supplement (https://geolsoc.figshare.com/ndownloader/files/13854335)
Supplement: Supplementary file 1 [file 13854335]

| Sl. no. | Magnitude (Mw) | Date-Month-Year | Lat (°N) | Long (°E) | Depth (km) |
| --- | --- | --- | --- | --- | --- |
| 1 | 5.0 | 28-12-1979 | 30.628 | 78.445 | 33.0 |
| 2 | 4.5 | 03-05-1984 | 30.500 | 78.404 | 33.0 |
| 3 | 4.2 | 27-10-1991 | 30.434 | 78.549 | 33.0 |
| 4 | 4.0 | 02-03-1992 | 30.542 | 78.538 | 33.0 |
| 5 | 4.0 | 09-08-1992 | 30.931 | 78.487 | 33.0 |
| 6 | 4.8 | 14-09-1996 | 30.748 | 78.307 | 33.0 |
| 7 | 4.6 | 25-09-1996 | 30.440 | 78.584 | 33.0 |
| 8 | 3.5 | 20-02-2005 | 30.655 | 78.243 | 25.0 |
| 9 | 4.2 | 16-08-2005 | 30.861 | 78.651 | 33.0 |
| 10 | 4.4 | 16-08-2005 | 30.924 | 78.560 | 42.6 |
| 11 | 4.4 | 27-11-2012 | 30.900 | 78.422 | 23.4 |

**Table S1.** Details of the seismic events whose epicentres are plotted on the map in Figure 1a. Data source: United States Geological Survey website (https://earthquake.usgs.gov/earthquakes/search/), accessed 24 May 2018.
